# Supplementary material
Source: Springer Nature journal article supplement (https://www.springermedizin.de/resource/supplementary/13058_2013_3425_MOESM4_ESM.pdf/9704096)

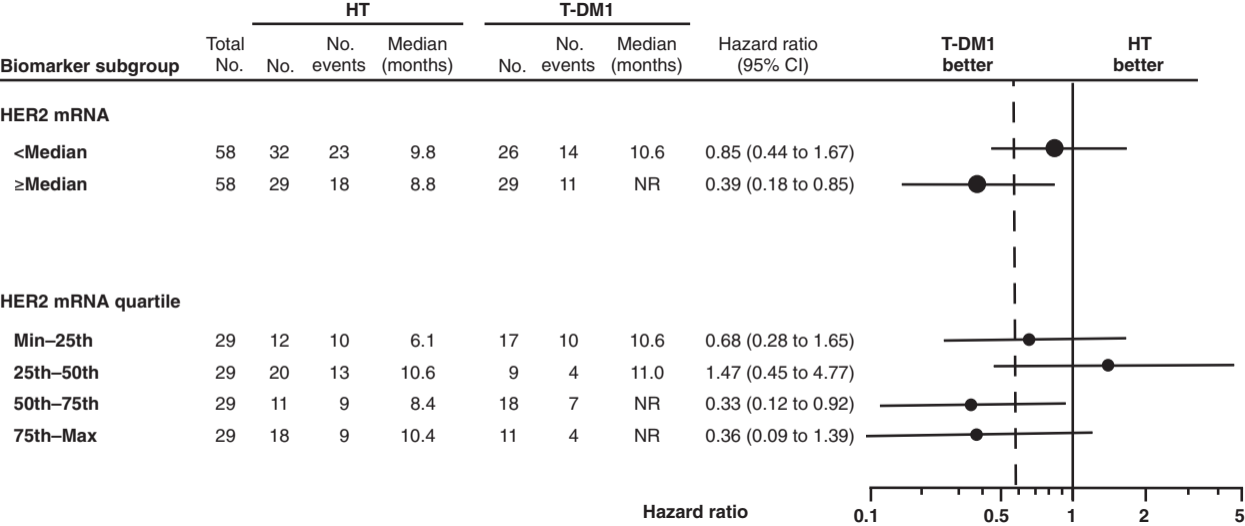

Supplement: MOESM4 [file 9704096]
